# Supplementary material
Source: MDPI journal article supplement (https://www.mdpi.com/2504-3110/6/6/341)
Supplement: s1 [file s1]

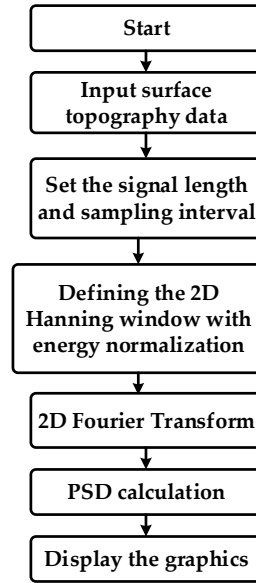

**Figure S1.** The calculation flow chart of 2D power spectral density.

The following describes the calculation process of the two-dimensional power spectral density of the grinding surface. Firstly, input the surface topography data. Secondly, set the signal length and sampling interval. The sampling length of the topographic data in this paper is 3mm and the interval is 2.931 $\mu$ m. Then define a two-dimensional Hanning window with energy normalization, and use the fft2 function in MATLAB software to perform a two-dimensional Fourier transform on the data. Finally, PSD calculation is performed on the data, and the power spectral density is displayed graphically.

**Table S1.** The relative errors of roughness parameters under different  $\delta_{\min}$  — Surface 1

|                         | Measured surface 1 | $\delta_{\min} = 10^{-3}$ m | $\delta_{\min} = 10^{-4}$ m | $\delta_{\min} = 10^{-5}$ m | $\delta_{\min} = 10^{-6}$ m | $\delta_{\min} = 10^{-7}$ m | $\delta_{\min} = 10^{-8}$ m | $\delta_{\min} = 10^{-9}$ m | $\delta_{\min} = 10^{-10}$ m |
|-------------------------|--------------------|-----------------------------|-----------------------------|-----------------------------|-----------------------------|-----------------------------|-----------------------------|-----------------------------|------------------------------|
| $S_a$ ( $\mu$ m)        | 0.112              | 0.0492                      | 0.0955                      | 0.1114                      | 0.1160                      | 0.1180                      | 0.1187                      | 0.1189                      | 0.1190                       |
| The relative errors (%) |                    | -56.07                      | -14.73                      | -0.54                       | 3.57                        | 5.36                        | 5.98                        | 6.16                        | 6.25                         |
| $S_q$ ( $\mu$ m)        | 0.132              | 0.0569                      | 0.1016                      | 0.1170                      | 0.1214                      | 0.1234                      | 0.1240                      | 0.1242                      | 0.1243                       |
| The relative errors (%) |                    | -56.89                      | -23.03                      | -11.36                      | -8.03                       | -6.52                       | -6.06                       | -5.91                       | -5.83                        |
| $S_{sk}$                | -0.142             | 0.0066                      | -0.1221                     | -0.1419                     | -0.1520                     | -0.1311                     | -0.136                      | -0.1357                     | -0.1355                      |
| The relative errors (%) |                    | -104.65                     | -14.01                      | -0.07                       | 7.04                        | -7.68                       | -4.23                       | -4.44                       | -4.58                        |
| $S_{ku}$                | 2.796              | 2.4704                      | 2.7369                      | 2.8254                      | 2.7961                      | 2.8123                      | 2.814                       | 2.8144                      | 2.8137                       |
| The relative errors (%) |                    | -16.65                      | -7.11                       | -3.95                       | -5.00                       | -4.42                       | -4.36                       | -4.34                       | -4.37                        |

**Table S2.** The relative errors of roughness parameters under different  $\delta_{\min}$  — Surface 2

|                            | Measured<br>surface 2 | $\delta_{\min}$<br>= $10^{-3}$ m | $\delta_{\min}$<br>= $10^{-4}$ m | $\delta_{\min}$<br>= $10^{-5}$ m | $\delta_{\min}$<br>= $10^{-6}$ m | $\delta_{\min}$<br>= $10^{-7}$ m | $\delta_{\min}$<br>= $10^{-8}$ m | $\delta_{\min}$<br>= $10^{-9}$ m | $\delta_{\min}$<br>= $10^{-10}$ m |
|----------------------------|-----------------------|----------------------------------|----------------------------------|----------------------------------|----------------------------------|----------------------------------|----------------------------------|----------------------------------|-----------------------------------|
| $Sa$ ( $\mu\text{m}$ )     | 0.266                 | 0.114                            | 0.2152                           | 0.247                            | 0.2555                           | 0.259                            | 0.2601                           | 0.2604                           | 0.2605                            |
| The relative<br>errors (%) |                       | -57.14                           | -19.10                           | -7.14                            | -3.95                            | -2.63                            | -2.22                            | -2.11                            | -2.07                             |
| $Sq$ ( $\mu\text{m}$ )     | 0.288                 | 0.132                            | 0.2293                           | 0.2601                           | 0.2682                           | 0.2715                           | 0.2726                           | 0.2729                           | 0.273                             |
| The relative<br>errors (%) |                       | -54.17                           | -20.38                           | -9.69                            | -6.87                            | -5.73                            | -5.35                            | -5.24                            | -5.21                             |
| $Ssk$                      | -0.129                | 0.0067                           | -0.1155                          | -0.1354                          | -0.144                           | -0.1285                          | -0.132                           | -0.1317                          | -0.1316                           |
| The relative<br>errors (%) |                       | -105.19                          | -10.47                           | 4.96                             | 11.63                            | -0.39                            | 2.33                             | 2.09                             | 2.02                              |
| $Sku$                      | 2.936                 | 2.4633                           | 2.7157                           | 2.8118                           | 2.7892                           | 2.8021                           | 2.803                            | 2.8035                           | 2.8031                            |
| The relative<br>errors (%) |                       | -16.10                           | -7.50                            | -4.23                            | -5.00                            | -4.56                            | -4.53                            | -4.51                            | -4.53                             |

**Table S3.** The relative errors of roughness parameters under different  $\delta_{\min}$  — Surface 3

|                            | Measured<br>surface 3 | $\delta_{\min}$<br>= $10^{-3}$ m | $\delta_{\min}$<br>= $10^{-4}$ m | $\delta_{\min}$<br>= $10^{-5}$ m | $\delta_{\min}$<br>= $10^{-6}$ m | $\delta_{\min}$<br>= $10^{-7}$ m | $\delta_{\min}$<br>= $10^{-8}$ m | $\delta_{\min}$<br>= $10^{-9}$ m | $\delta_{\min}$<br>= $10^{-10}$ m |
|----------------------------|-----------------------|----------------------------------|----------------------------------|----------------------------------|----------------------------------|----------------------------------|----------------------------------|----------------------------------|-----------------------------------|
| $Sa$ ( $\mu\text{m}$ )     | 0.403                 | 0.1826                           | 0.3394                           | 0.3864                           | 0.3984                           | 0.4032                           | 0.4046                           | 0.405                            | 0.4051                            |
| The relative<br>errors (%) |                       | -54.69                           | -15.78                           | -4.12                            | -1.14                            | 0.05                             | 0.40                             | 0.50                             | 0.52                              |
| $Sq$ ( $\mu\text{m}$ )     | 0.441                 | 0.2115                           | 0.3621                           | 0.4074                           | 0.4188                           | 0.4233                           | 0.4247                           | 0.425                            | 0.4252                            |
| The relative<br>errors (%) |                       | -52.04                           | -17.89                           | -7.62                            | -5.03                            | -4.01                            | -3.70                            | -3.63                            | -3.58                             |
| $Ssk$                      | -0.137                | 0.0068                           | -0.1118                          | -0.1315                          | -0.1393                          | -0.1262                          | -0.1291                          | -0.1289                          | -0.1288                           |
| The relative<br>errors (%) |                       | -104.96                          | -18.39                           | -4.01                            | 1.68                             | -7.88                            | -5.77                            | -5.91                            | -5.99                             |
| $Sku$                      | 2.903                 | 2.4592                           | 2.704                            | 2.8022                           | 2.7828                           | 2.7941                           | 2.7948                           | 2.7952                           | 2.7949                            |
| The relative<br>errors (%) |                       | -15.29                           | -6.85                            | -3.47                            | -4.14                            | -3.75                            | -3.73                            | -3.71                            | -3.72                             |

**Table S4.** The relative errors of roughness parameters under different  $\delta_{\min}$  — Surface 4

|                            | Measured<br>surface 4 | $\delta_{\min}$<br>= $10^{-3}$ m | $\delta_{\min}$<br>= $10^{-4}$ m | $\delta_{\min}$<br>= $10^{-5}$ m | $\delta_{\min}$<br>= $10^{-6}$ m | $\delta_{\min}$<br>= $10^{-7}$ m | $\delta_{\min}$<br>= $10^{-8}$ m | $\delta_{\min}$<br>= $10^{-9}$ m | $\delta_{\min}$<br>= $10^{-10}$ m |
|----------------------------|-----------------------|----------------------------------|----------------------------------|----------------------------------|----------------------------------|----------------------------------|----------------------------------|----------------------------------|-----------------------------------|
| $Sa$ ( $\mu\text{m}$ )     | 0.672                 | 0.3068                           | 0.5678                           | 0.6448                           | 0.6642                           | 0.6718                           | 0.674                            | 0.6746                           | 0.6748                            |
| The relative<br>errors (%) |                       | -54.35                           | -15.51                           | -4.05                            | -1.16                            | -0.03                            | 0.30                             | 0.39                             | 0.42                              |
| $Sq$ ( $\mu\text{m}$ )     | 0.733                 | 0.0069                           | 0.6058                           | 0.6801                           | 0.6984                           | 0.7057                           | 0.7078                           | 0.7083                           | 0.7086                            |
| The relative<br>errors (%) |                       | -99.06                           | -17.35                           | -7.22                            | -4.72                            | -3.72                            | -3.44                            | -3.37                            | -3.33                             |
| $Ssk$                      | -0.135                | 0.0069                           | -0.1107                          | -0.1303                          | -0.1379                          | -0.1254                          | -0.1281                          | -0.1279                          | -0.1279                           |
| The relative               |                       | -105.11                          | -18.00                           | -3.48                            | 2.15                             | -7.11                            | -5.11                            | -5.26                            | -5.26                             |

| errors (%)              |       |        |        |       |        |        |        |        |        |
|-------------------------|-------|--------|--------|-------|--------|--------|--------|--------|--------|
| <i>Sku</i>              | 2.912 | 2.4579 | 2.7005 | 2.799 | 2.7805 | 2.7913 | 2.7921 | 2.7924 | 2.7921 |
| The relative errors (%) |       | -15.59 | -7.26  | -3.88 | -4.52  | -4.14  | -4.12  | -4.11  | -4.12  |

**Table S5.** The relative errors of roughness parameters under different modeling methods – Surface 1

|                | Measured surface 1 | Ubiquitiformal surface | The relative errors (%) | Fractal surface | The relative errors (%) |
|----------------|--------------------|------------------------|-------------------------|-----------------|-------------------------|
| <i>Sa</i> (μm) | 0.112              | 0.118                  | -5.36                   | 0.138           | -23.21                  |
| <i>Sq</i> (μm) | 0.132              | 0.124                  | 6.06                    | 0.141           | -6.82                   |
| <i>Ssk</i>     | -0.142             | -0.136                 | 4.23                    | -0.024          | 83.10                   |
| <i>Sku</i>     | 2.796              | 2.814                  | -0.64                   | 2.748           | 1.72                    |

**Table S6.** The relative errors of roughness parameters under different modeling methods – Surface 2

|                | Measured surface 2 | Ubiquitiformal surface | The relative errors (%) | Fractal surface | The relative errors (%) |
|----------------|--------------------|------------------------|-------------------------|-----------------|-------------------------|
| <i>Sa</i> (μm) | 0.266              | 0.26                   | 2.26                    | 0.298           | -12.03                  |
| <i>Sq</i> (μm) | 0.288              | 0.273                  | 5.21                    | 0.305           | -5.90                   |
| <i>Ssk</i>     | -0.129             | -0.132                 | -2.33                   | -0.024          | 81.40                   |
| <i>Sku</i>     | 2.936              | 2.803                  | 4.53                    | 2.723           | 7.25                    |

**Table S7.** The relative errors of roughness parameters under different modeling methods – Surface 3

|                | Measured surface 3 | Ubiquitiformal surface | The relative errors (%) | Fractal surface | The relative errors (%) |
|----------------|--------------------|------------------------|-------------------------|-----------------|-------------------------|
| <i>Sa</i> (μm) | 0.403              | 0.405                  | -0.50                   | 0.46            | -14.14                  |
| <i>Sq</i> (μm) | 0.441              | 0.425                  | 3.63                    | 0.472           | -7.03                   |
| <i>Ssk</i>     | -0.137             | -0.129                 | 5.84                    | -0.024          | 82.48                   |
| <i>Sku</i>     | 2.903              | 2.795                  | 3.72                    | 2.709           | 6.68                    |

**Table S8.** The relative errors of roughness parameters under different modeling methods – Surface 4

|                | Measured surface 4 | Ubiquitiformal surface | The relative errors (%) | Fractal surface | The relative errors (%) |
|----------------|--------------------|------------------------|-------------------------|-----------------|-------------------------|
| <i>Sa</i> (μm) | 0.672              | 0.674                  | -0.30                   | 0.765           | -13.84                  |
| <i>Sq</i> (μm) | 0.733              | 0.708                  | 3.41                    | 0.784           | -6.96                   |
| <i>Ssk</i>     | -0.135             | -0.128                 | 5.19                    | -0.024          | 82.22                   |
| <i>Sku</i>     | 2.912              | 2.792                  | 4.12                    | 2.705           | 7.11                    |
